# Supplementary material for: The Development of a Multiple-Item Annoyance Scale (MIAS) for Transportation Noise Annoyance
Source: PubMed Central journal article supplement (PMC5982010; doi:10.3390/ijerph15050971), 2018-05-12
Supplement: ijerph-15-00971-s001.pdf [file ijerph-15-00971-s001.pdf]

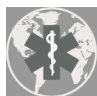

# Supplement Material: The Development of A Multiple-item Annoyance Scale (MIAS) for Transportation Noise Annoyance

Dirk Schreckenberg, Christin Belke and Jan Spilski

## 1. NORAH Questionnaire items used in the analyses

**Table S1.** List of items for the assessment of aircraft noise annoyance and similar items referring to road traffic noise annoyance and railway noise annoyance.

| <Source-specific> noise-related disturbances                                  | Affective evaluation, attitudes                                                                                                                                                                                                                    | Perception of loss of control, lack of coping capacity                                                                                                                                                                   |
|-------------------------------------------------------------------------------|----------------------------------------------------------------------------------------------------------------------------------------------------------------------------------------------------------------------------------------------------|--------------------------------------------------------------------------------------------------------------------------------------------------------------------------------------------------------------------------|
| In the last 12 months, how much has <source-specific> noise disturbed you ... | I-9. a-c ICBEN 5-point noise annoyance                                                                                                                                                                                                             | <i>Perceived capability to cope with noise:</i>                                                                                                                                                                          |
| I-1. during communication, when using the phone at home                       | I-9a. Thinking about the last 12 months, when you are at home, how much does noise from road traffic disturb or annoy you?                                                                                                                         | Now, we come to general opinions about noise. Please tell me to what extent do you agree to the following statements. Please indicate whether you agree (1) not, (2) a little bit, (3) moderately, (4) rather, (5) very. |
| I-2. when listening to the radio and watching TV                              | (1) not at all, (2) slightly, (3) moderately, (4) very, (5) extremely.                                                                                                                                                                             | I-16. I know that I can protect myself quite well against noise.                                                                                                                                                         |
| I-3. when reading and concentrating                                           | I-9b. And what about railway noise? Does it disturb or annoy you                                                                                                                                                                                   | I-17. If it is too loud outside, I simply close the windows, and then I am no longer disturbed.                                                                                                                          |
| I-4. when having visitors at home                                             | (1) not at all, (2) slightly, (3) moderately, (4) very, (5) extremely?                                                                                                                                                                             | I-18. Sometimes, I really feel at the mercy of the noise.                                                                                                                                                                |
| I-5. when staying and/or recovering outdoors                                  | I-9c. And what about aircraft noise? Does it disturb or annoy you                                                                                                                                                                                  | I-19. If it is very loud, I just mentally switch off.                                                                                                                                                                    |
| I-6. when falling asleep                                                      | (1) not at all, (2) slightly, (3) moderately, (4) very, (5) extremely?                                                                                                                                                                             | I-20. I do not hear the noise anymore.                                                                                                                                                                                   |
| I-7. during the night                                                         | <i>Expectations concerning impact of air traffic on residential quality of life:</i>                                                                                                                                                               | I-21. I have accepted the fact that the noise is here.                                                                                                                                                                   |
| I-8. when awakening                                                           | Now, we come to general opinions about the airport <airport name> and its operations. Please tell me to what extent you agree to the following statements, i.e. whether you agree (1) not, (2) a little bit, (3) moderately, (4) rather, (5) very. |                                                                                                                                                                                                                          |
| (1) not at all, (2) slightly, (3) moderately, (4) very, (5) extremely         | I-10. The air traffic leads to fall in value of residence and properties                                                                                                                                                                           |                                                                                                                                                                                                                          |
|                                                                               | I-11. The air traffic spoils residents'                                                                                                                                                                                                            |                                                                                                                                                                                                                          |

| <Source-specific> noise-related disturbances | Affective evaluation, attitudes                                                                                                                                                                                                                                                                                                                                                                                                                                                                                                                                                                                                                                                                                                                                 | Perception of loss of control, lack of coping capacity |
|----------------------------------------------|-----------------------------------------------------------------------------------------------------------------------------------------------------------------------------------------------------------------------------------------------------------------------------------------------------------------------------------------------------------------------------------------------------------------------------------------------------------------------------------------------------------------------------------------------------------------------------------------------------------------------------------------------------------------------------------------------------------------------------------------------------------------|--------------------------------------------------------|
|                                              | <p>outdoor stay in the garden, on the terrace or on the balcony.</p> <p>Not included in the EFA for aircraft noise annoyance but part of the assessed statements of expectations (Cronbach's of the 4-items expectation scale: <math>\alpha = 0.74</math>)</p> <ul style="list-style-type: none"> <li>• The airport improves the regional development</li> <li>• The air traffic brings new jobs to the region</li> </ul> <p><i>Attributes of &lt;noise source&gt;</i></p> <p>What do you think about &lt;noise source&gt;? Do you think the &lt;noise source&gt; is ... (1) not, (2) a little bit, (3) moderately, (4) rather, (5) very ...</p> <p>I-12. useful<br/>I-13. dangerous for me<br/>I-14. comfortable for users<br/>I-15. environmental harmful</p> |                                                        |

*Note.* <source-specific> refers either to aircraft, road traffic, or railway noise, depending on the focus of the NORAH sub-studies (air: FRA-air, BER-air, CGN-air, STR-air; road: FRA-road; rail: FRA-rail).

**Table S2:** Items of the non-acoustical variables correlated with noise annoyance (in addition to the list of items in Table S1).

| Variables                  | Items                                                                                                                                                                                                                                                                                                                                                                                                                                                                                                                                                                                                                                                                                                 | Cronbach's Alpha (in samples at Frankfurt Airport) |
|----------------------------|-------------------------------------------------------------------------------------------------------------------------------------------------------------------------------------------------------------------------------------------------------------------------------------------------------------------------------------------------------------------------------------------------------------------------------------------------------------------------------------------------------------------------------------------------------------------------------------------------------------------------------------------------------------------------------------------------------|----------------------------------------------------|
| Trust in authorities - air | <p>Do you think that ... do everything they can to reduce noise annoyance due to aircraft in the population?</p> <p>(1) aircraft manufactures<br/>(2) airlines<br/>(3) the airport operator (Fraport AG),<br/>(4) municipalities<br/>(5) the Federal State Government of Hess,</p> <p><i>not included in the score 'trust in authorities':</i></p> <p>(6) the regional Aircraft Noise Commission<br/>(7) German Air Traffic Control<br/>(8) the regional dialogue forum 'Forum Airport &amp; Region'<br/>(9) the Aircraft Noise Commissioner<br/>(10) the Federal Aviation Office</p> <p>Response scale: &lt;authority&gt; endeavours (1) not; (2) a little; (3) moderately; (4) fairly; (5) very</p> | 0.84                                               |

| Variables                           | Items                                                                                                                                                                                                                                                                                           | Cronbach's Alpha<br>(in samples at Frankfurt Airport) |
|-------------------------------------|-------------------------------------------------------------------------------------------------------------------------------------------------------------------------------------------------------------------------------------------------------------------------------------------------|-------------------------------------------------------|
| Trust in authorities - road         | Do you think that ... do everything they can to reduce noise annoyance due to road traffic in the population?                                                                                                                                                                                   | 0.81                                                  |
|                                     | (1) car manufacturers<br>(2) regional public transport companies<br>(3) municipalities<br>(4) the Federal State Government<br>(5) car drivers                                                                                                                                                   |                                                       |
|                                     | Response scale: <authority> endeavours (1) not; (2) a little; (3) moderately; (4) fairly; (5) very                                                                                                                                                                                              |                                                       |
| Trust in authorities – railway      | Do you think that ... do everything they can to reduce noise annoyance due to rail traffic in the population?                                                                                                                                                                                   | 0.80                                                  |
|                                     | (1) Deutsche Bahn AG (German railway)<br>(2) municipalities<br>(3) the Federal State Government                                                                                                                                                                                                 |                                                       |
|                                     | Response scale: <authority> endeavours (1) not; (2) a little; (3) moderately; (4) fairly; (5) very                                                                                                                                                                                              |                                                       |
| Perceived procedural fairness – air | (1) I think that aircraft noise is distributed fairly amongst all residents;                                                                                                                                                                                                                    | 0.67                                                  |
|                                     | (2) When decisions concerning aircraft noise are being made, I have opportunities to express my views to the relevant people;<br>(3) I have the chance to appeal decisions that I consider to be wrong;<br>(4) Decisions concerning aircraft noise are explained and justified to me in detail. |                                                       |
|                                     | Response scale: Agree (1) not; (2) a little; (3) moderately; (4) fairly; (5) very                                                                                                                                                                                                               |                                                       |

| Variables                                   | Items                                                                                                                                                  | Cronbach's Alpha<br>(in samples at Frankfurt Airport) |
|---------------------------------------------|--------------------------------------------------------------------------------------------------------------------------------------------------------|-------------------------------------------------------|
| SF8 Physical Component Summary              | (1) Overall, how would you rate your health in the past 4 weeks?                                                                                       |                                                       |
|                                             | (2) During the past 4 weeks, how much did physical health problems limit your usual physical activities (such as walking or climbing stairs)?          |                                                       |
|                                             | (3) During the past 4 weeks, how much difficulty did you have doing your daily work, both at home and away from home, because of your physical health? |                                                       |
|                                             | (4) How much bodily pain have you had in the past 4 weeks?                                                                                             |                                                       |
|                                             | (5) During the past 4 weeks, how much energy did you have?                                                                                             |                                                       |
| SF8 Mental Component Summary                | (6) During the past 4 weeks, how much did your physical health or emotional problems limit your usual social activities with family or friends?        |                                                       |
|                                             | (7) During the past 4 weeks, how much have you been bothered by emotional problems (such as feeling anxious, depressed or irritable)?                  |                                                       |
|                                             | (8) During the past 4 weeks, how much did personal or emotional problems keep you from doing your usual work, school or other daily activities?        |                                                       |
| Noise sensitivity (single item from NoiSeq) | I-7. I am sound-sensitive.                                                                                                                             |                                                       |
|                                             | Response scale:<br>(1) strongly agree; (2) slightly agree; (3) slightly disagree; (4) strongly disagree.                                               |                                                       |

## 2. Confirmatory factory analyses (CFA)

### 2.1 CFA for aircraft noise annoyance at Frankfurt Airport (FRA-air)

**Table S3.** Items MIAS scale (FRA-air,  $N = 3508$ )

|           |        |                                  |
|-----------|--------|----------------------------------|
|           | Dist1  | Disturb talk/phone               |
| F1        | Dist2  | Disturb radio TV                 |
|           | Dist3  | Disturb concentration            |
| Annoyance | Annoy  | Annoyance (aircraft)             |
|           | Cope 1 | Protect against noise (recorded) |
| F2        | Cope 2 | Close windows (recorded)         |
|           | Cope 3 | At the mercy of the noise        |

**Table S4.** Additional information - Final Factor loadings CFA (FRA-air,  $N = 3508$ )

| Item  | Model A | Model C |       |
|-------|---------|---------|-------|
|       |         | F1      | F2    |
| Dist1 | 0.918   | 0.888   |       |
| Dist2 | 0.898   | 0.863   |       |
| Dist3 | 0.904   | 0.933   |       |
| Annoy | 0.801   |         |       |
| Cope1 | 0.529   |         | 0.637 |
| Cope2 | 0.565   |         | 0.640 |
| Cope3 | 0.698   |         | 0.863 |

Note. Standardized factor loads, wave 3 ( $N = 3508$ , with imputed data, 0); \*  $p < 0.001$ . Model A = MIAS, 1 factor; model C = CFA, three indicators and residual co-variances

**Table S5.** Fit indices of CFA (FRA-air,  $N = 3508$ )

| Model   | $\chi^2$ | $df$ | $p$     | $CFI$ | $RMSEA$ (90% CI)    | $SRMR$ | $AIC$     |
|---------|----------|------|---------|-------|---------------------|--------|-----------|
| Model A | 1582.786 | 14   | < 0.001 | 0.878 | 0.179 (0.171-0.186) | 0.074  | 68948.858 |
| Model B | 100.413  | 11   | < 0.001 | 0.993 | 0.048 (0.040-0.057) | 0.023  | 67086.043 |
| Model C | 70.992   | 10   | < 0.001 | 0.995 | 0.042 (0.033-0.051) | 0.012  | 67057.113 |

Note.  $\chi^2$ : Chi-square-test,  $df$ : degrees of freedom,  $p$  = probability of error,  $CFI$ : comparative fit index,  $RMSEA$ : root mean square error of approximation, 90% CI = 90% Confidence interval,  $SRMR$ : standardized root mean square residual values,  $AIC$ : Akaike information criterion.

**Table S6.** Factors' psychometric adequacy (MIAS scale FRA-air,  $N = 3508$ )

| Construct               | CR   | $\alpha$ | AVE  | 1       | 2       | 3   |
|-------------------------|------|----------|------|---------|---------|-----|
| Disturbance             | 0.92 | 0.94     | 0.80 | ---     |         |     |
| Lack of coping capacity | 0.76 | 0.79     | 0.52 | 0.79*** | ---     |     |
| Annoyance (single item) | ---  | ---      | ---  | 0.80*** | 0.77*** | --- |

Note. AVE = average variance extracted; CR = composite reliabilities,  $\alpha$  = Cronbach's Alpha, the remaining values indicate correlations between factors. \*\*\*  $p < 0.001$ .

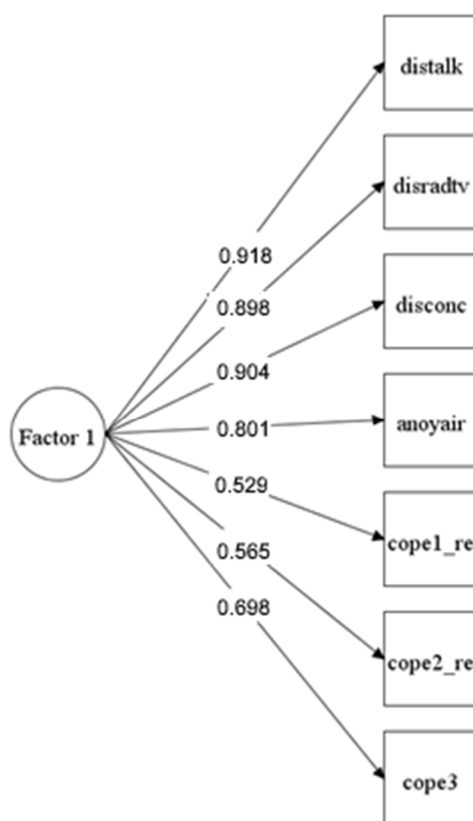

Figure S1. CFA model A: Aircraft (FRA-air; N = 3508)

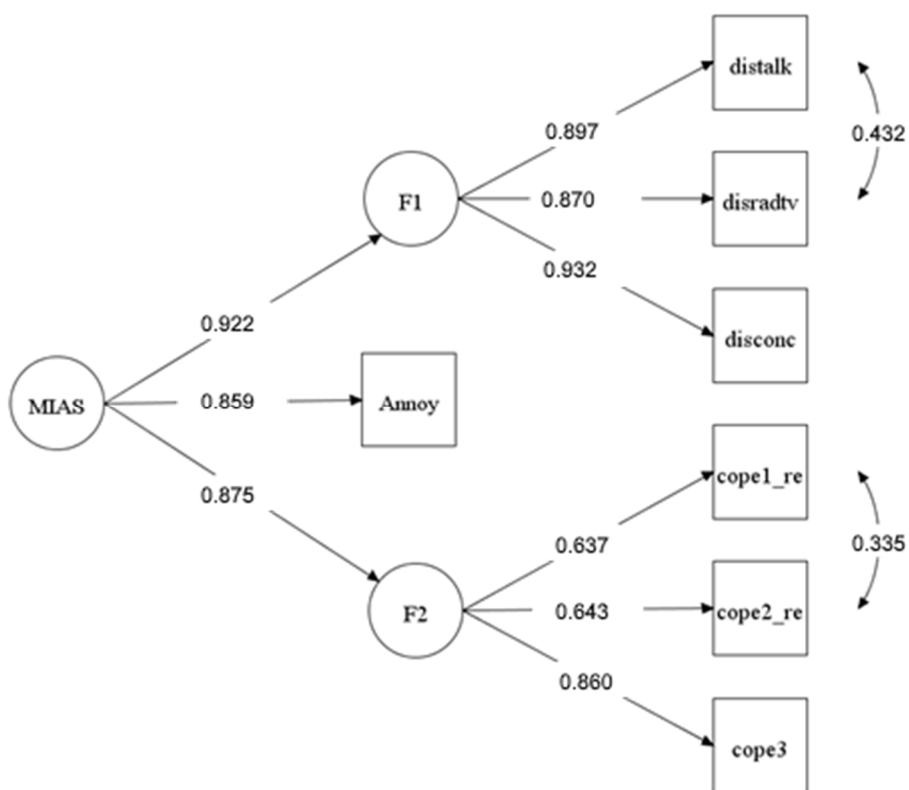

Figure S2. CFA-model B: Aircraft (FRA-air; N = 3508)

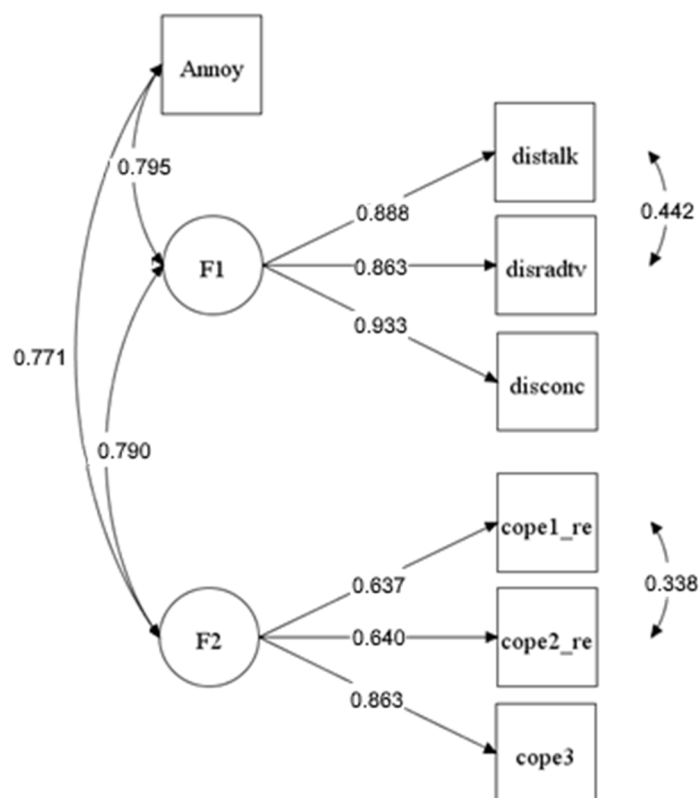

**Figure S3.** CFA-model C: Aircraft (FRA-air; N = 3508)

2.2 CFA for aircraft noise annoyance at different airports

**Table S7.** Comparison of fit indices of CFA for the multiple-item aircraft noise annoyance scale (MIAS-air) conducted with data of the samples FRA, BER, CGN, and STR.

| Model                   | $\chi^2$   | df | p       | CFI   | RMSEA<br>(90% CI)   | SRMR  | AIC        |
|-------------------------|------------|----|---------|-------|---------------------|-------|------------|
| 'FRA-air'<br>(n = 3508) | A 1582.786 | 14 | < 0.001 | 0.878 | 0.179 (0.171-0.186) | 0.074 | 68948.858  |
|                         | B 100.413  | 11 | < 0.001 | 0.993 | 0.048 (0.040-0.057) | 0.023 | 67086.043  |
| 'BER-air'<br>(n = 5548) | A 2037.111 | 14 | < 0.001 | 0.863 | 0.161 (0.156-0.167) | 0.087 | 106269.291 |
|                         | B 245.345  | 11 | < 0.001 | 0.984 | 0.062 (0.055-0.069) | 0.038 | 104097.298 |
| 'CGN-air'<br>(n = 2954) | A 1360.386 | 14 | < 0.001 | 0.857 | 0.180(0.172-0.189)  | 0.089 | 59403.792  |
|                         | B 103.090  | 11 | < 0.001 | 0.990 | 0.053 (0.044-0.063) | 0.034 | 57867.201  |
| 'STR-air'<br>(n = 1979) | A 693.917  | 14 | < 0.001 | 0.865 | 0.157 (0.147-0.167) | 0.090 | 37849.159  |
|                         | B 97.945   | 11 | < 0.001 | 0.983 | 0.063 (0.052-0.075) | 0.033 | 37092.805  |

Note.  $\chi^2$ : Chi square test, df: degrees of freedom, p = probability of error, CFI: comparative fit index, RMSEA: root mean square error of approximation, 90% CI = 90% confidence interval, SRMR: standardized root mean square residual values, AIC: Akaike information criterion.

2.3 CFA for railway noise annoyance (FRA-rail)

**Table S8.** Items MIAS scale (railway) - FRA-rail, N = 3307

|           |        |                                 |
|-----------|--------|---------------------------------|
|           | Dist1  | Disturb talk/phone              |
| F1        | Dist2  | Disturb radio TV                |
|           | Dist3  | Disturb concentration           |
| Annoyance | Annoy  | Annoyance (railway)             |
|           | Cope 1 | Protect against noise (recoded) |
| F2        | Cope 2 | Close windows (recoded)         |
|           | Cope 3 | At the mercy of the noise       |

**Table S9.** Additional information - Final Factor loadings CFA (FRA-rail, N = 3307)

| Item  | Model A | Model C |       |
|-------|---------|---------|-------|
|       |         | F1      | F2    |
| Dist1 | 0.924   | 0.902   |       |
| Dist2 | 0.921   | 0.901   |       |
| Dist3 | 0.908   | 0.928   |       |
| Annoy | 0.731   |         |       |
| Cope1 | 0.298   |         | 0.551 |
| Cope2 | 0.279   |         | 0.518 |
| Cope3 | 0.464   |         | 0.926 |

Note. Standardized factor loads, wave 2 (N = 3307, with imputed data, FIML); \* p < 0.001. Model A = MIAS, 1 factor; model C = CFA, three indicators and residual co-variances

**Table S10.** Fit indices of CFA (Railway, FRA-rail, N = 3307)

| Model   | $\chi^2$ | df | p       | CFI   | RMSEA (90% CI)      | SRMR  | AIC       |
|---------|----------|----|---------|-------|---------------------|-------|-----------|
| Model A | 1639.183 | 14 | < 0.001 | 0.797 | 0.187 (0.180-0.195) | 0.124 | 62445.933 |
| Model B | 152.457  | 11 | < 0.001 | 0.982 | 0.062 (0.054-0.071) | 0.033 | 60364.530 |
| Model C | 36.812   | 10 | < 0.001 | 0.997 | 0.028 (0.019-0.039) | 0.008 | 60231.457 |

Note.  $\chi^2$ : Chi-square-test, df: degrees of freedom, p = probability of error, CFI: comparative fit index, RMSEA: root mean square error of approximation, 90% CI = 90% Confidence interval, SRMR: standardized root mean square residual values, AIC: Akaike information criterion.

**Table S11.** Factors' psychometric adequacy (MIAS scale railway, FRA-rail, N = 3307)

| Construct               | CR   | $\alpha$ | AVE  | 1       | 2       | 3   |
|-------------------------|------|----------|------|---------|---------|-----|
| Disturbance             | 0.94 | 0.94     | 0.83 | ---     |         |     |
| Lack of coping capacity | 0.72 | 0.76     | 0.48 | 0.48*** | ---     |     |
| Annoyance (single item) | ---  | ---      | ---  | 0.73*** | 0.51*** | --- |

Note. AVE = average variance extracted; CR = composite reliabilities,  $\alpha$  = Cronbach's Alpha, the remaining values indicate correlations between factors. \*\*\* p < 0.001.



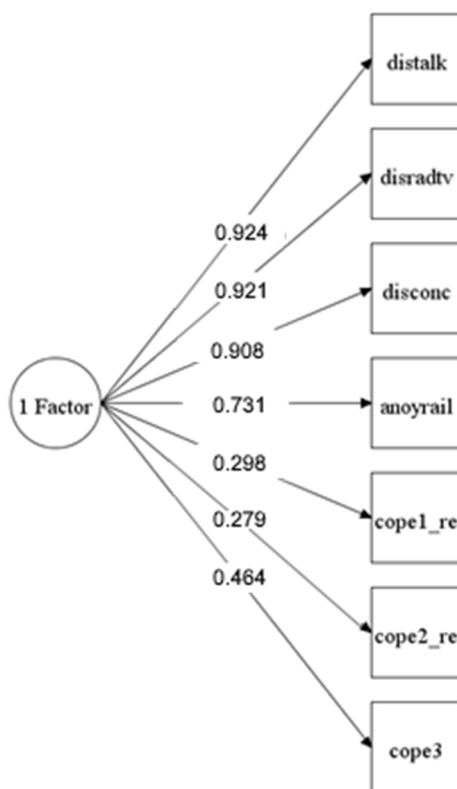

Figure S4. CFA-model A: Railway (FRA-rail,  $N = 3307$ )

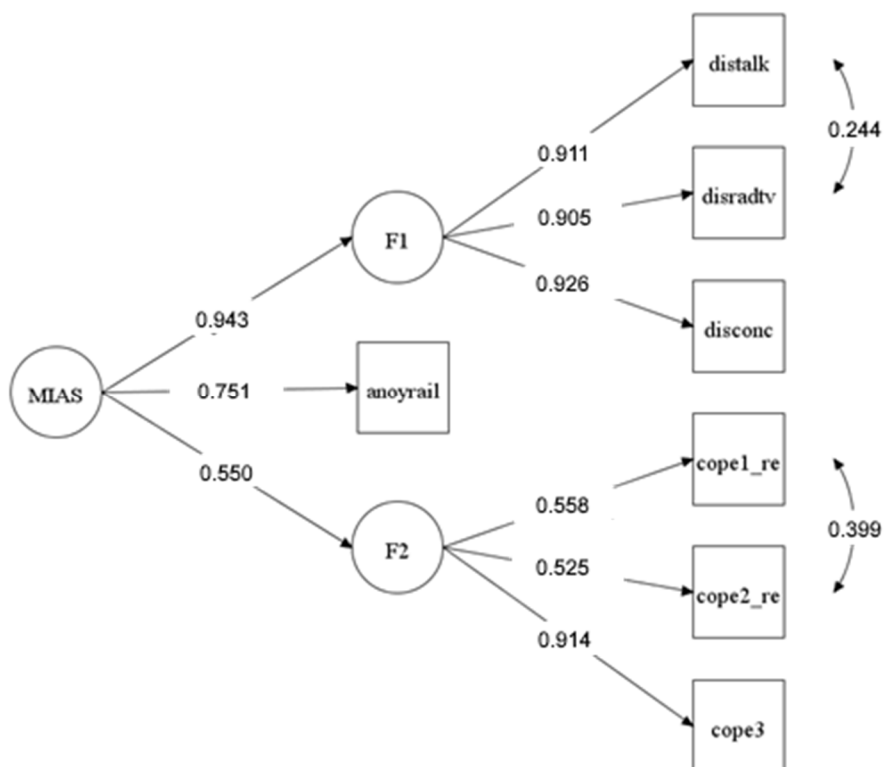

Figure S5. CFA-model B: Railway (FRA-rail,  $N = 3307$ )

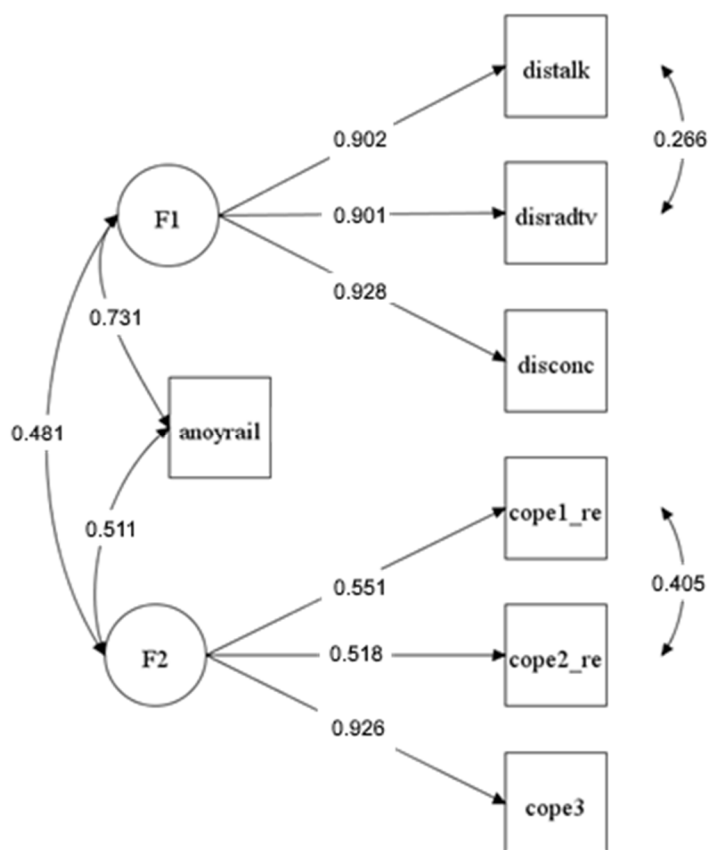

**Figure S6.** CFA-model C: Railway (FRA-rail, N = 3307)

2.4 CFA for road noise (FRA-road)

**Table S12.** Items MIAS scale (road, FRA-road, N = 3172)

|           |        |                                  |
|-----------|--------|----------------------------------|
|           | Dist1  | Disturb talk/phone               |
| F1        | Dist2  | Disturb radio TV                 |
|           | Dist3  | Disturb concentration            |
| Annoyance | Annoy  | Annoyance (railway)              |
|           | Cope 1 | Protect against noise (recorded) |
| F2        | Cope 2 | Close windows (recorded)         |
|           | Cope 3 | At the mercy of the noise        |

**Table S13.** Additional information - Final Factor loadings CFA (FRA-road, N = 3172)

| Item  | Model A | Model C |       |
|-------|---------|---------|-------|
|       |         | F1      | F2    |
| Dist1 | 0.897   | 0.853   |       |
| Dist2 | 0.889   | 0.849   |       |
| Dist3 | 0.875   | 0.912   |       |
| Annoy | 0.694   |         |       |
| Cope1 | 0.290   |         | 0.473 |
| Cope2 | 0.261   |         | 0.445 |
| Cope3 | 0.500   |         | 0.961 |

Note. Standardized factor loads, wave 2 (N = 3172, with imputed data, FIML); \* p < 0.001. Model A = MIAS, 1 factor; model C = CFA, three indicators and residual co-variances

**Table S14.** Fit indices of CFA (road, FRA-road, N = 3172)

| Model   | $\chi^2$ | df | p       | CFI   | RMSEA (90% CI)      | SRMR  | AIC       |
|---------|----------|----|---------|-------|---------------------|-------|-----------|
| Model A | 1569.665 | 14 | < 0.001 | 0.791 | 0.187 (0.179-0.195) | 0.114 | 58908.756 |
| Model B | 273.560  | 11 | < 0.001 | 0.965 | 0.087 (0.078-0.096) | 0.046 | 57208.810 |
| Model C | 64.728   | 10 | < 0.001 | 0.993 | 0.042 (0.032-0.051) | 0.013 | 56983.212 |

Note.  $\chi^2$ : Chi-square-test, df: degrees of freedom, p = probability of error, CFI: comparative fit index, RMSEA: root mean square error of approximation, 90% CI = 90% Confidence interval, SRMR: standardized root mean square residual values, AIC: Akaike information criterion.

**Table S15.** Factors' psychometric adequacy (MIAS scale model road, FRA-road, N = 3172)

| Construct               | CR   | $\alpha$ | AVE  | 1       | 2       | 3   |
|-------------------------|------|----------|------|---------|---------|-----|
| Disturbance             | 0.91 | 0.92     | 0.76 | ---     |         |     |
| Lack of coping capacity | 0.68 | 0.73     | 0.45 | 0.50*** | ---     |     |
| Annoyance (single item) | ---  | ---      | ---  | 0.70*** | 0.51*** | --- |

Note. AVE = average variance extracted; CR = composite reliabilities,  $\alpha$  = Cronbach's Alpha, the remaining values indicate correlations between factors. \*\*\* p < 0.001.

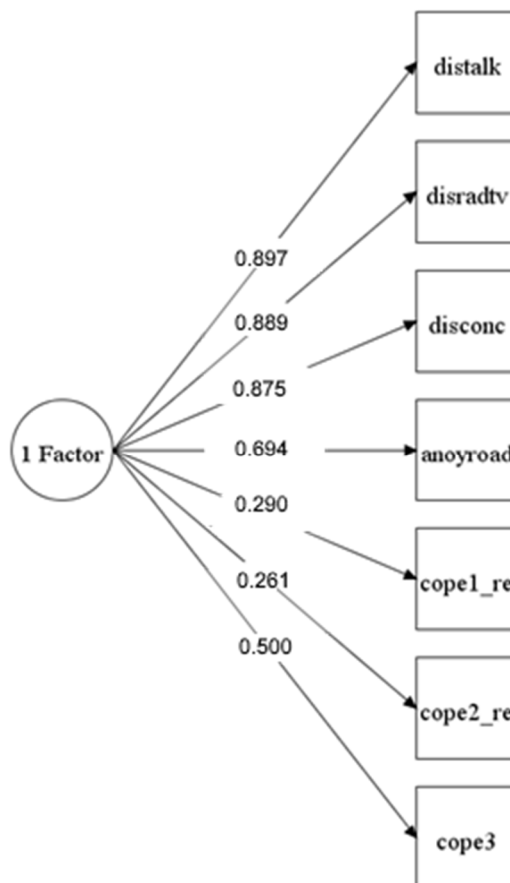

**Figure S7.** CFA-model A: Road (FRA-road, N = 3172)

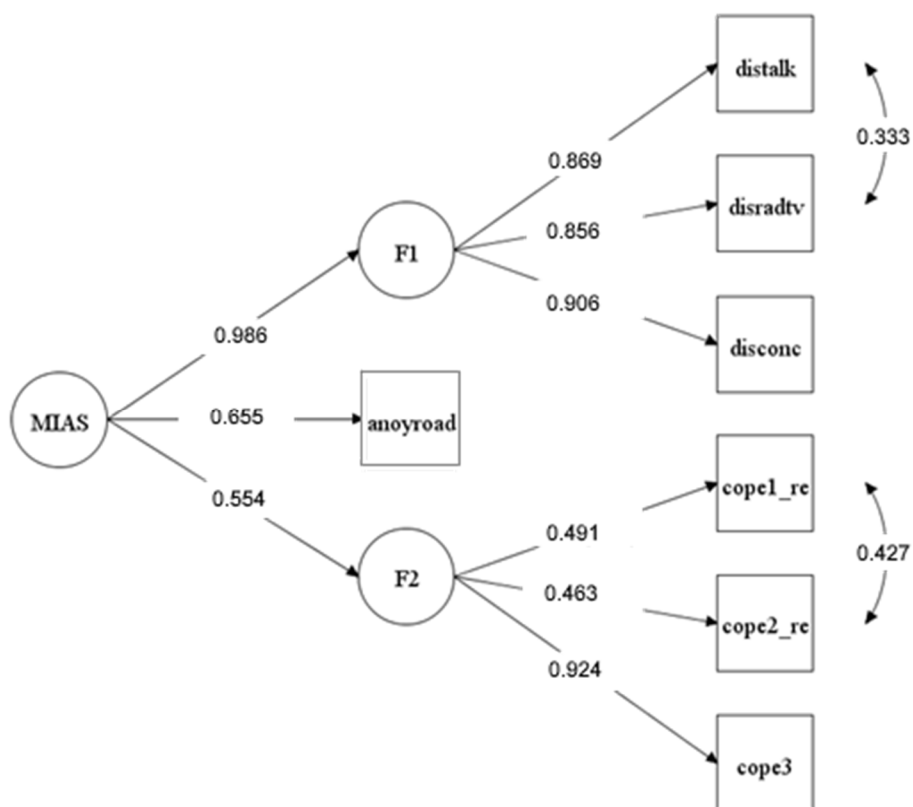

**Figure S8.** CFA-model B: Road (FRA-road,  $N = 3172$ )

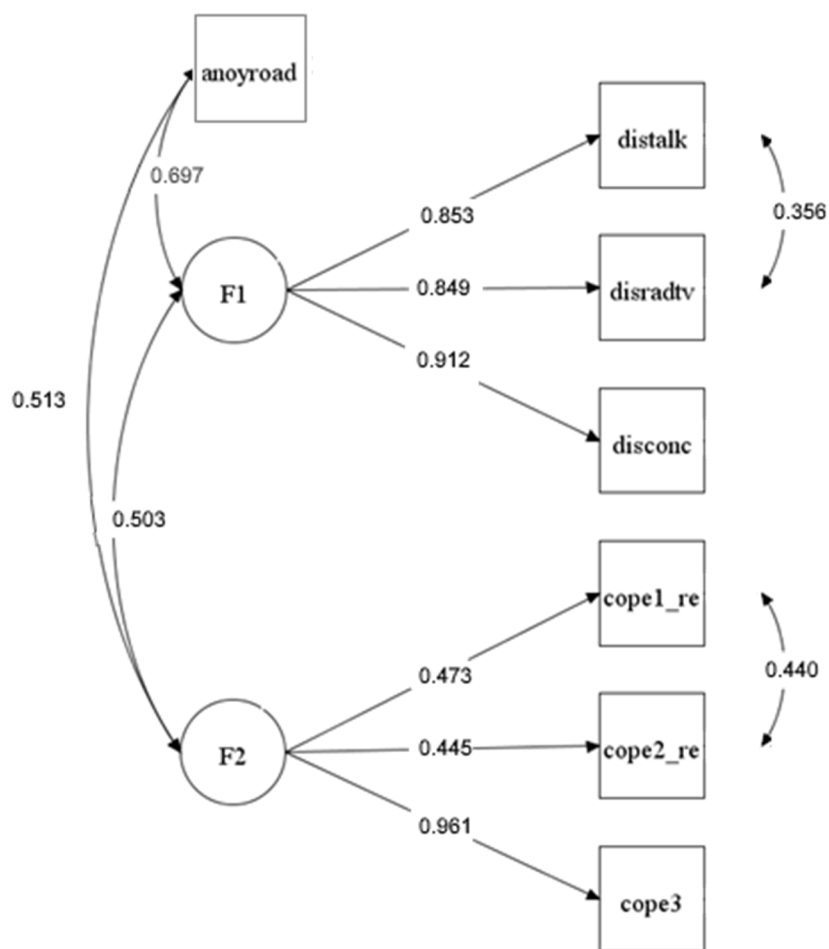

**Figure S9.** CFA-model C: Road (FRA-road, N = 3172)

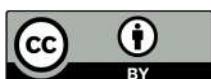

© 2018 by the authors. Submitted for possible open access publication under the terms and conditions of the Creative Commons Attribution (CC BY) license (<http://creativecommons.org/licenses/by/4.0/>).
